# Supplementary material for: HIF-1α determines the metastatic potential of gastric cancer cells
Source: PubMed Central journal article supplement (PMC2653758; doi:10.1038/sj.bjc.6604919), 2009-02-17

**NORMAL STOMACH**

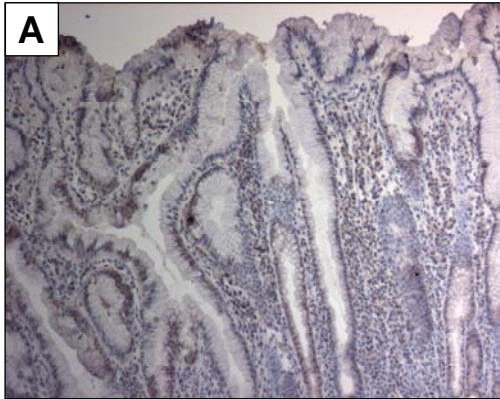

**EARLY GASTRIC CANCER**

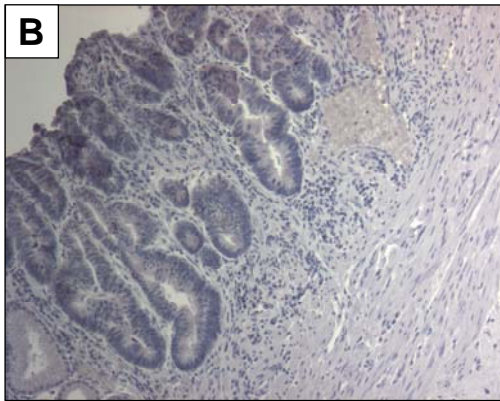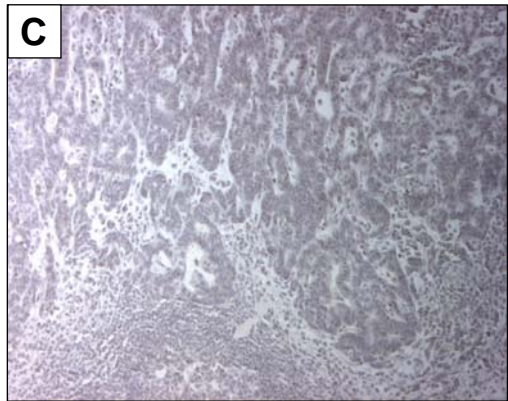

**A**

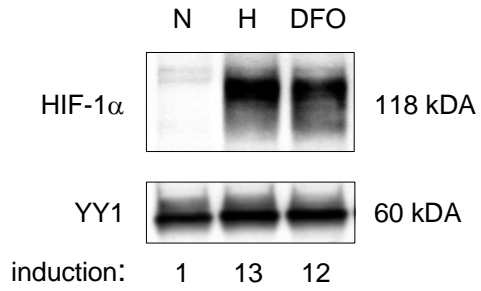

**B**

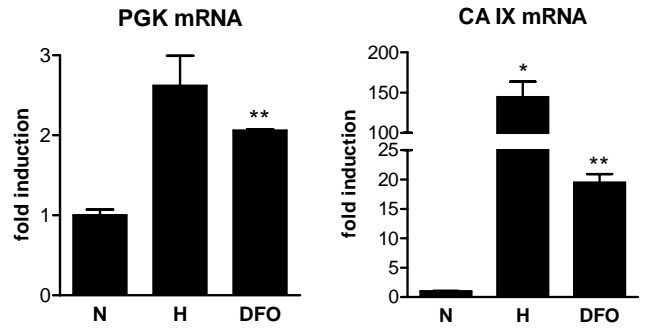

**C**

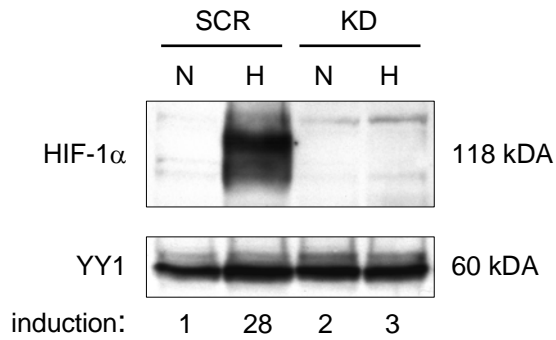

**D**

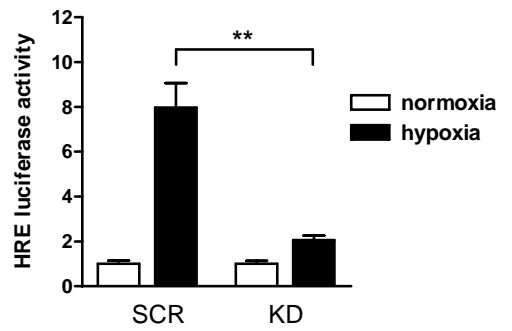

**E**

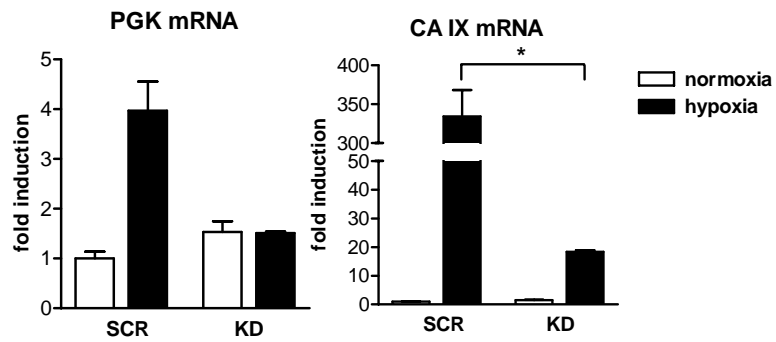

Supplement: 6604919x1.pdf [file 6604919x1.pdf]
